# Supplementary material
Source: PubMed Central journal article supplement (PMC2148325)

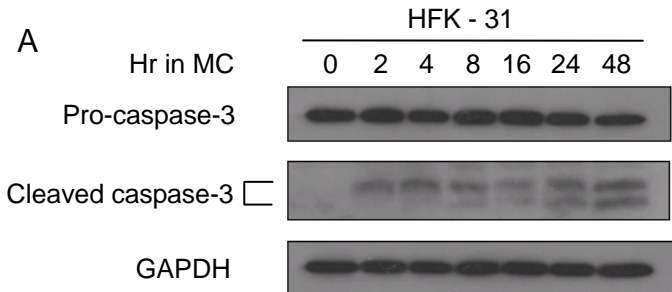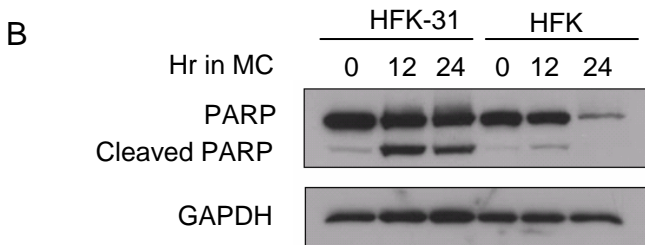

Supplement: pnas_0707947104_1.pdf [file pnas_0707947104_1.pdf]

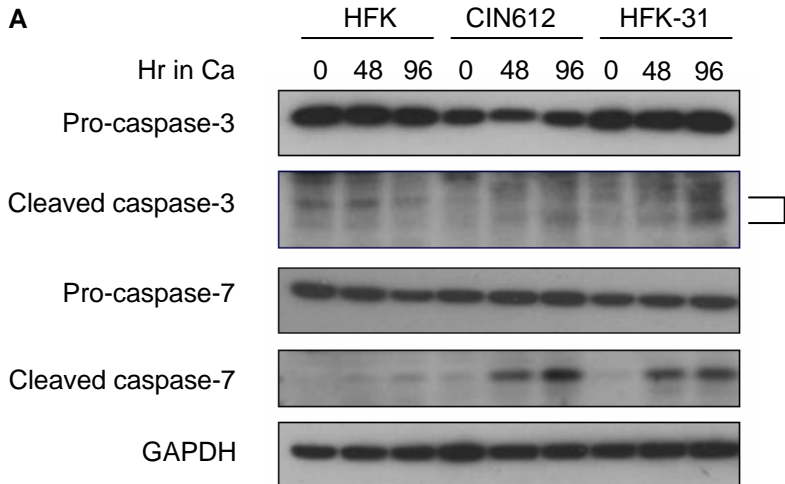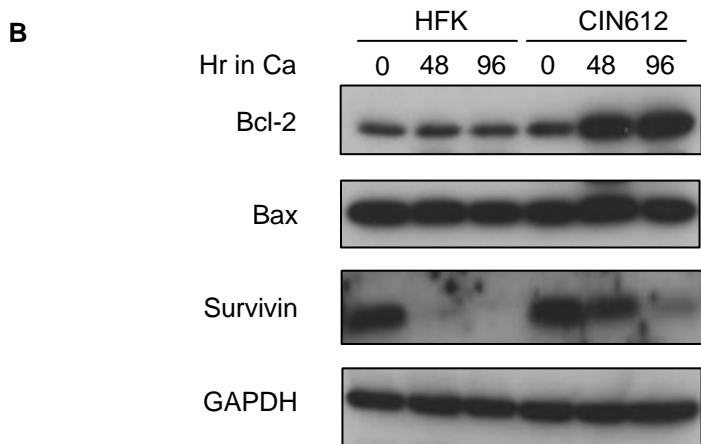

Supplement: pnas_0707947104_2.pdf [file pnas_0707947104_2.pdf]

Relative Fluorescence units

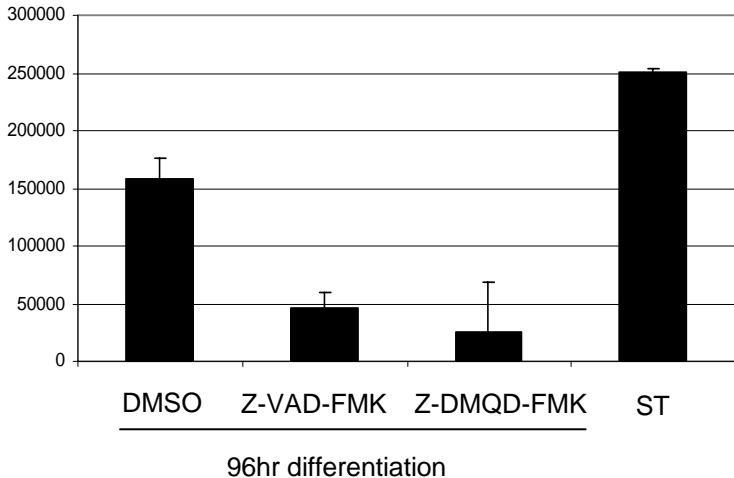

Supplement: pnas_0707947104_3.pdf [file pnas_0707947104_3.pdf]
